# Supplementary material
Source: PubMed Central journal article supplement (PMC7856031)

# Supplementary Figure 1

**A**

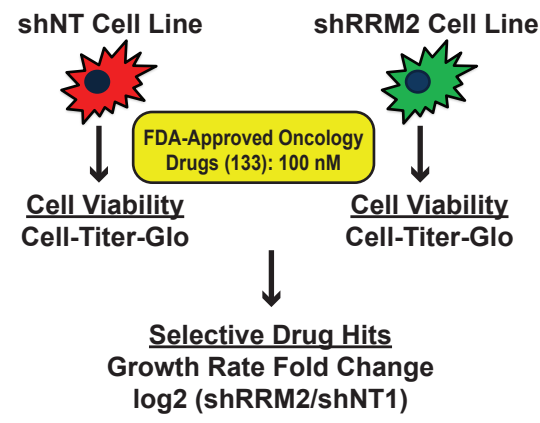

**B**

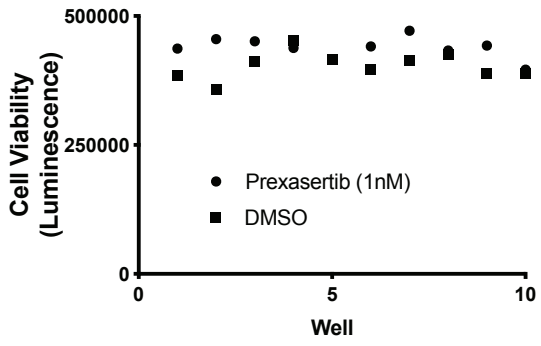

**C**

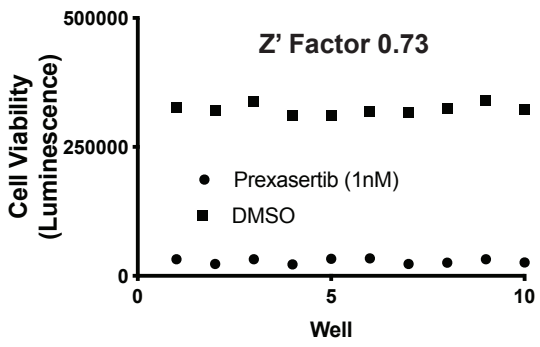

**D**

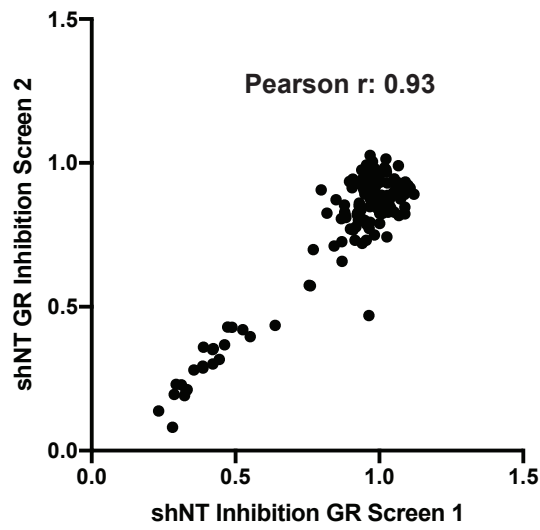

**E**

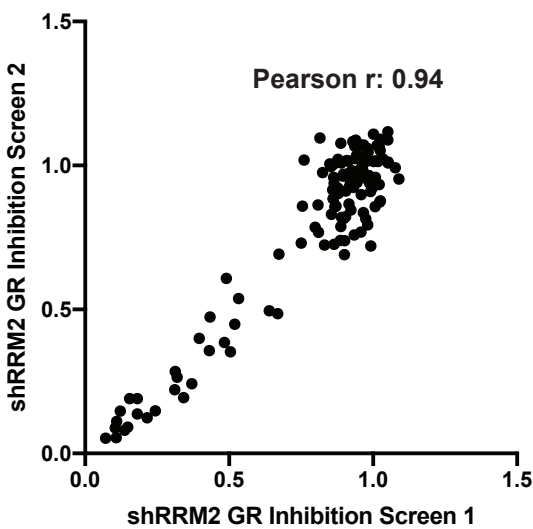

Supplement: NIHMS1642724-supplement-1.pdf [file NIHMS1642724-supplement-1.pdf]

Supplementary Figure 2

A

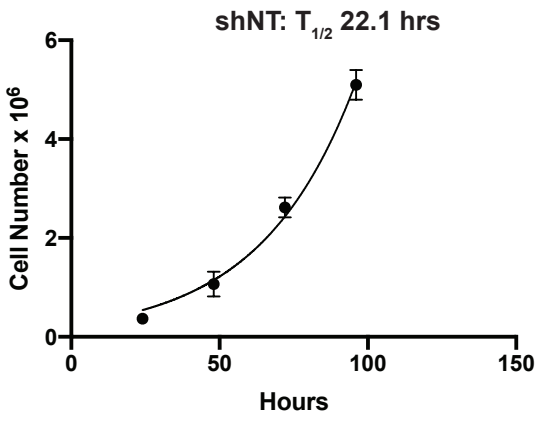

B

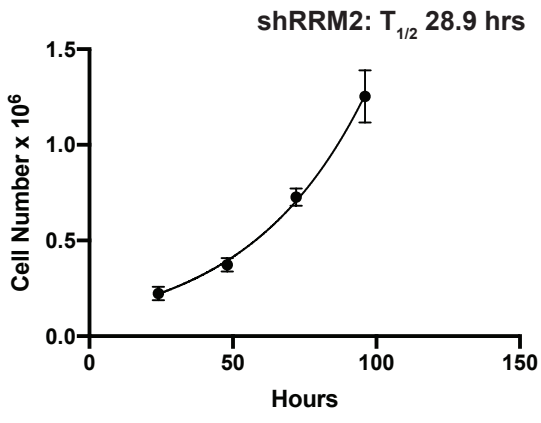

Supplement: NIHMS1642724-supplement-2.pdf [file NIHMS1642724-supplement-2.pdf]

# Supplementary Figure 4

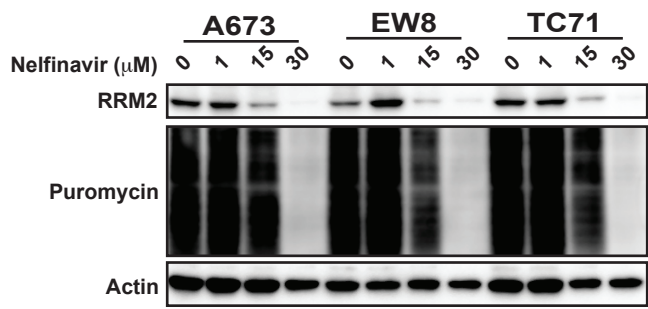

Supplement: NIHMS1642724-supplement-4.pdf [file NIHMS1642724-supplement-4.pdf]

# Supplementary Figure 5

**A**

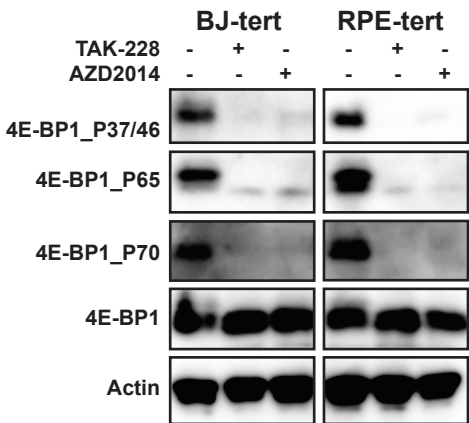

**B**

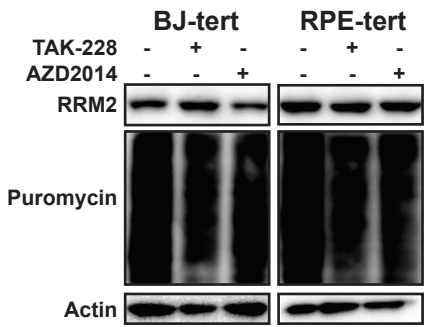

Supplement: NIHMS1642724-supplement-5.pdf [file NIHMS1642724-supplement-5.pdf]

# Supplementary Figure 6

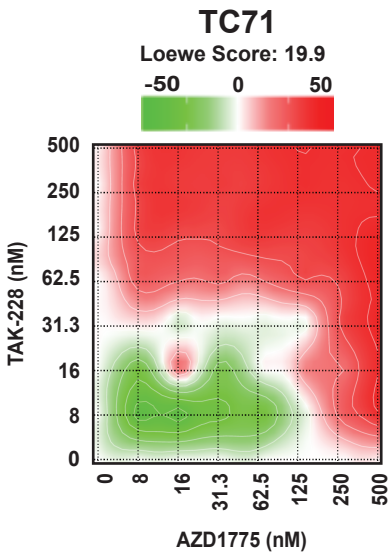

Supplement: NIHMS1642724-supplement-6.pdf [file NIHMS1642724-supplement-6.pdf]

# Supplementary Figure 7

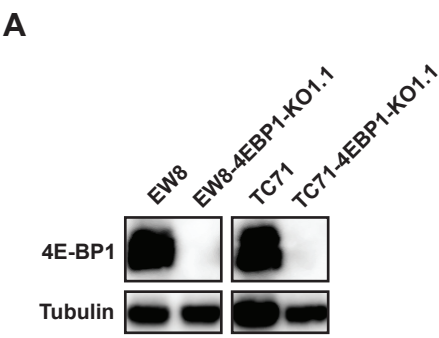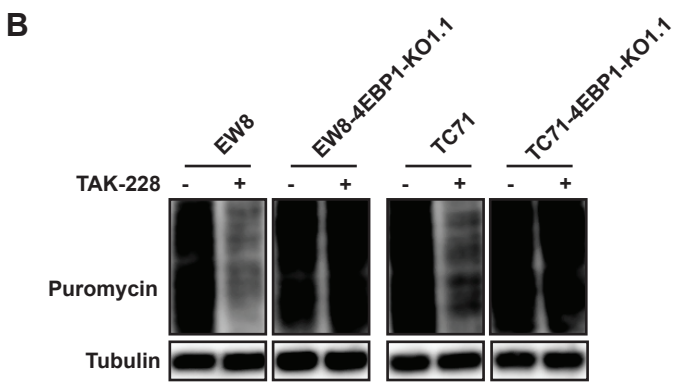

Supplement: NIHMS1642724-supplement-7.pdf [file NIHMS1642724-supplement-7.pdf]
